# Supplementary material for: MASTL induces Colon Cancer progression and Chemoresistance by promoting Wnt/β-catenin signaling
Source: Springer Nature journal article supplement (doi:10.1186/s12943-018-0848-3), 2018-08-01

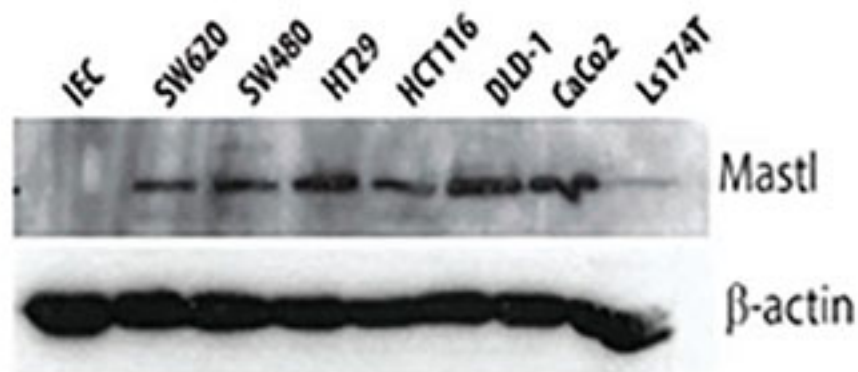

### Overall Survival

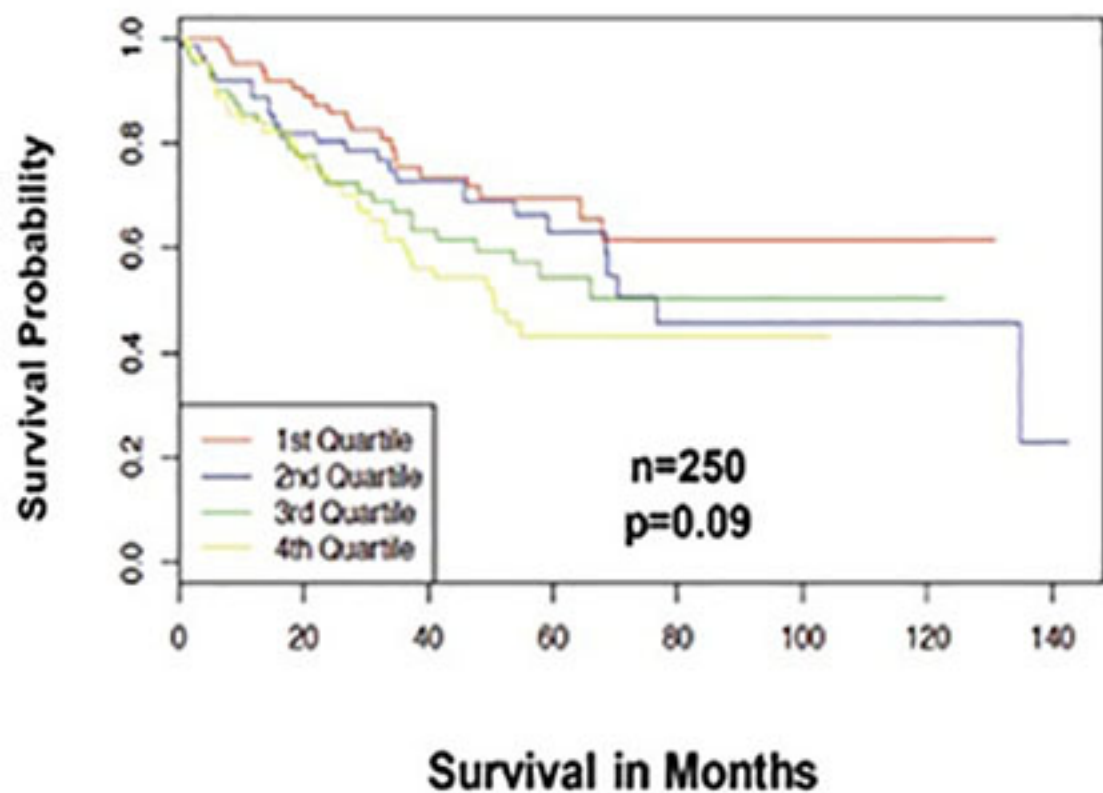

**DAPI****MASTL****MERGE****SW620C**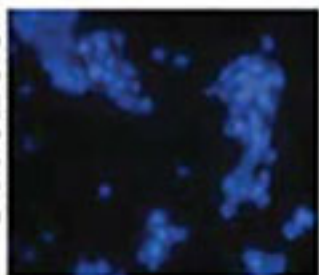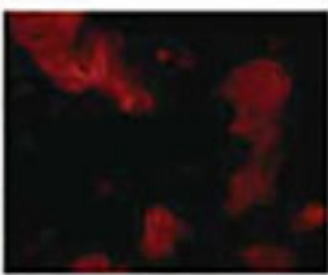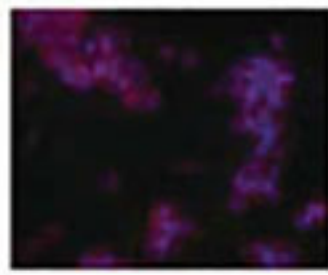**SW620MKD**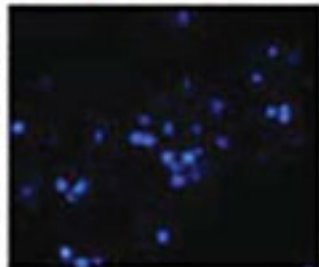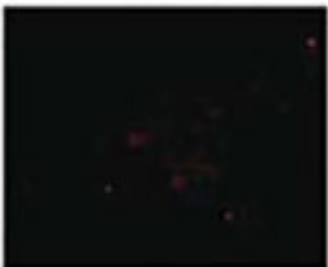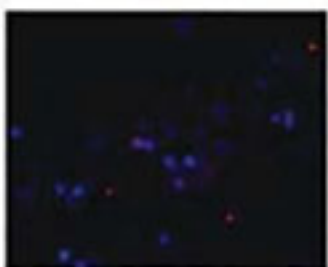**DAPI****MASTL****MERGE****HCT116C**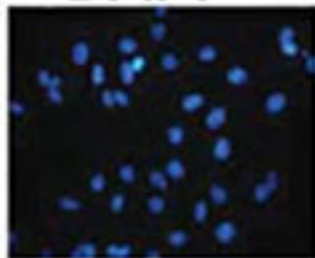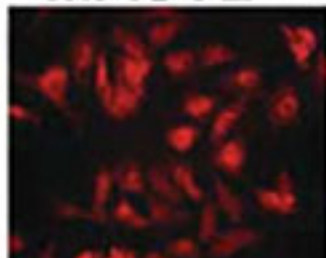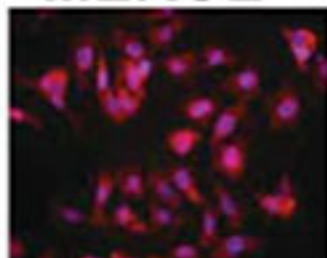**HCT116MKD**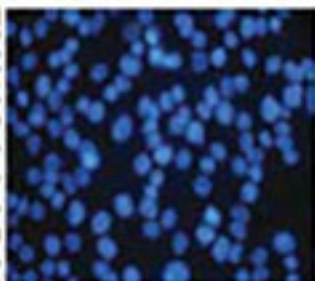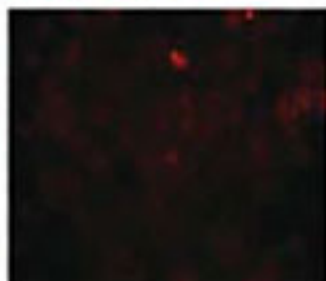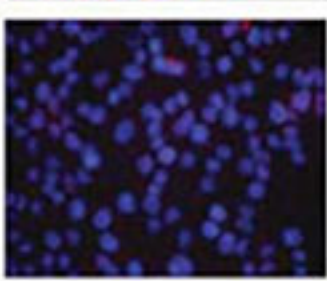

A

### Colony formation assay

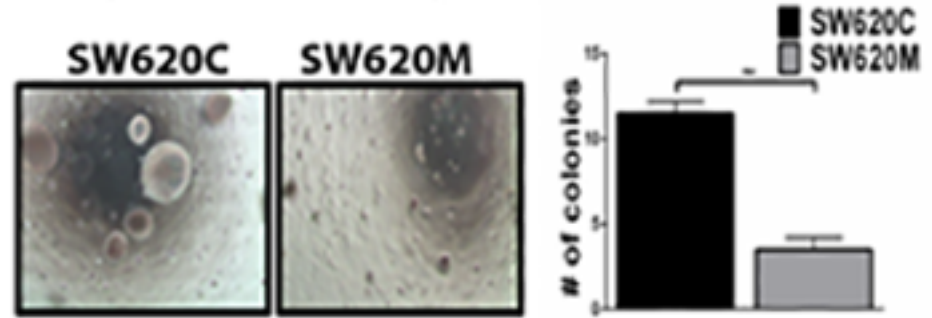

B

### Colony formation assay

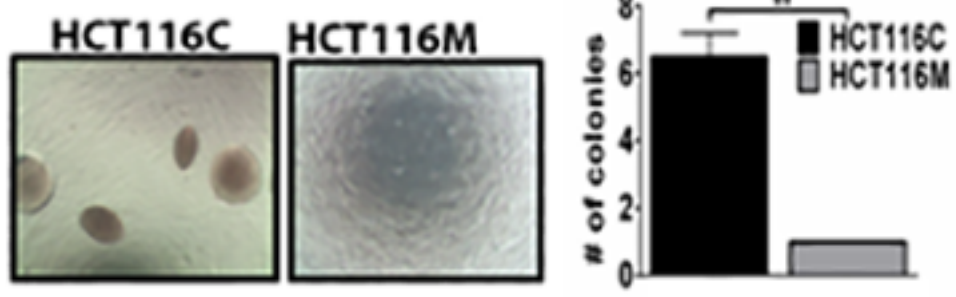

HCT116C

A15,A16==BclxL

1 2 3 4 5 6 7 8 9 10 11 12 13 14 15 16 17 18 19 20 21 22 23 24

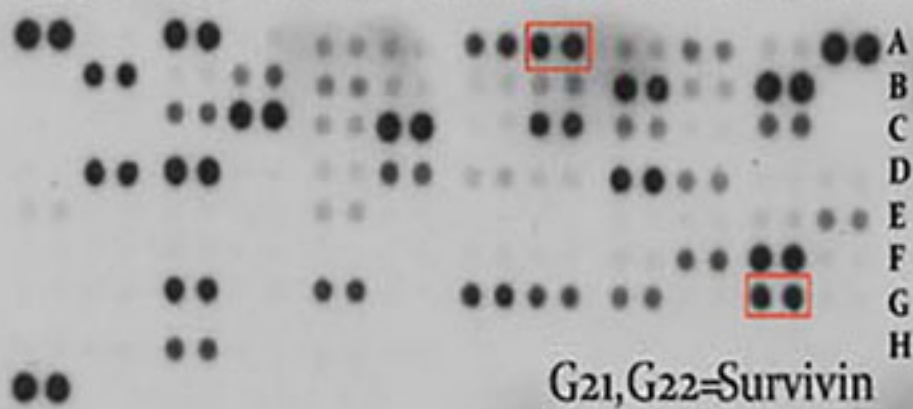

HCT116MKD

1 2 3 4 5 6 7 8 9 10 11 12 13 14 15 16 17 18 19 20 21 22 23 24

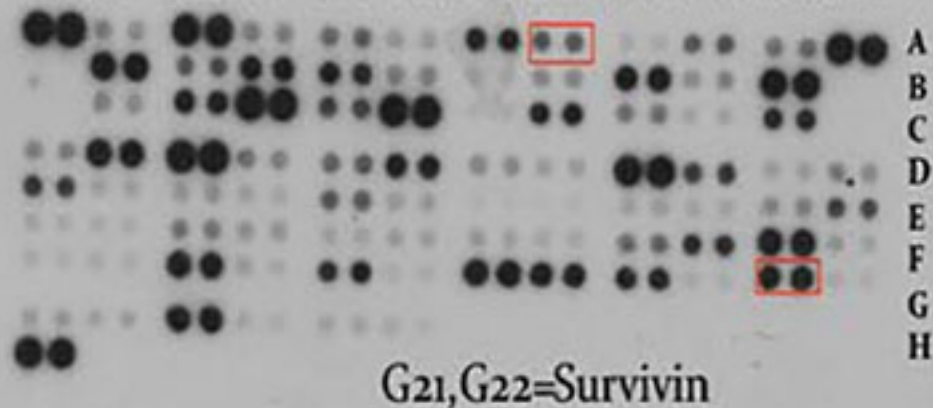

620C

1 2 3 4 5 6 7 8 9 10 11 12 13 14 15 16 17 18 19 20 21 22 23 24

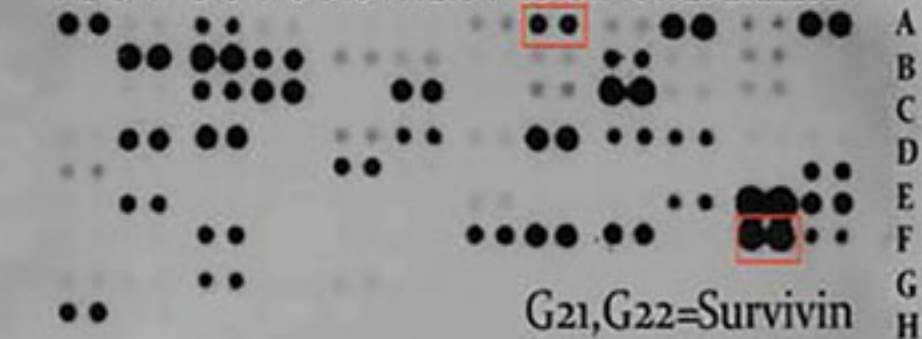

620MKD

1 2 3 4 5 6 7 8 9 10 11 12 13 14 15 16 17 18 19 20 21 22 23 24

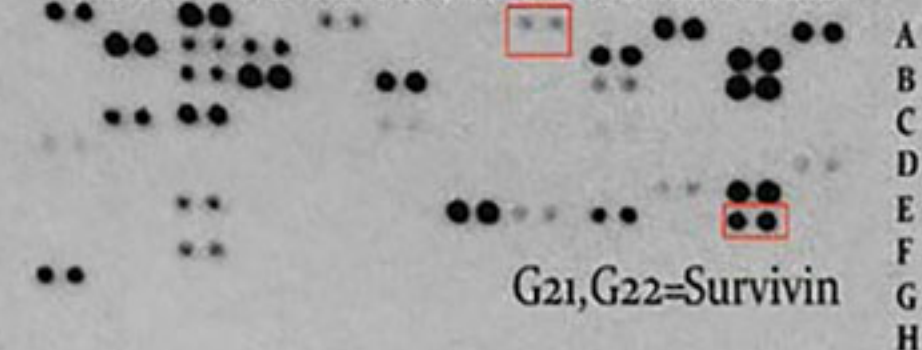

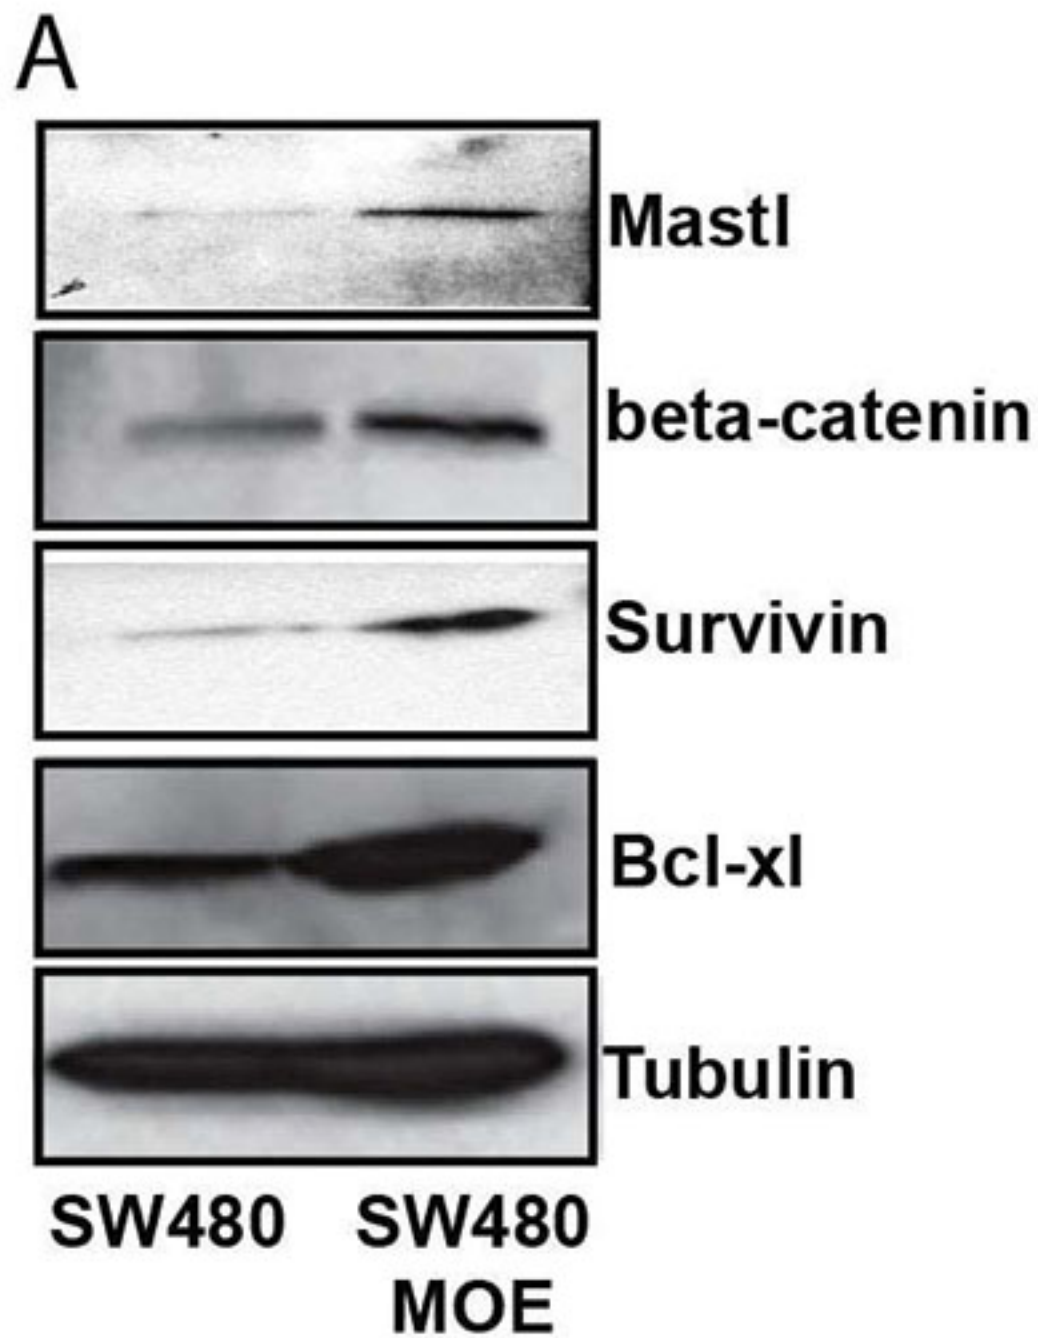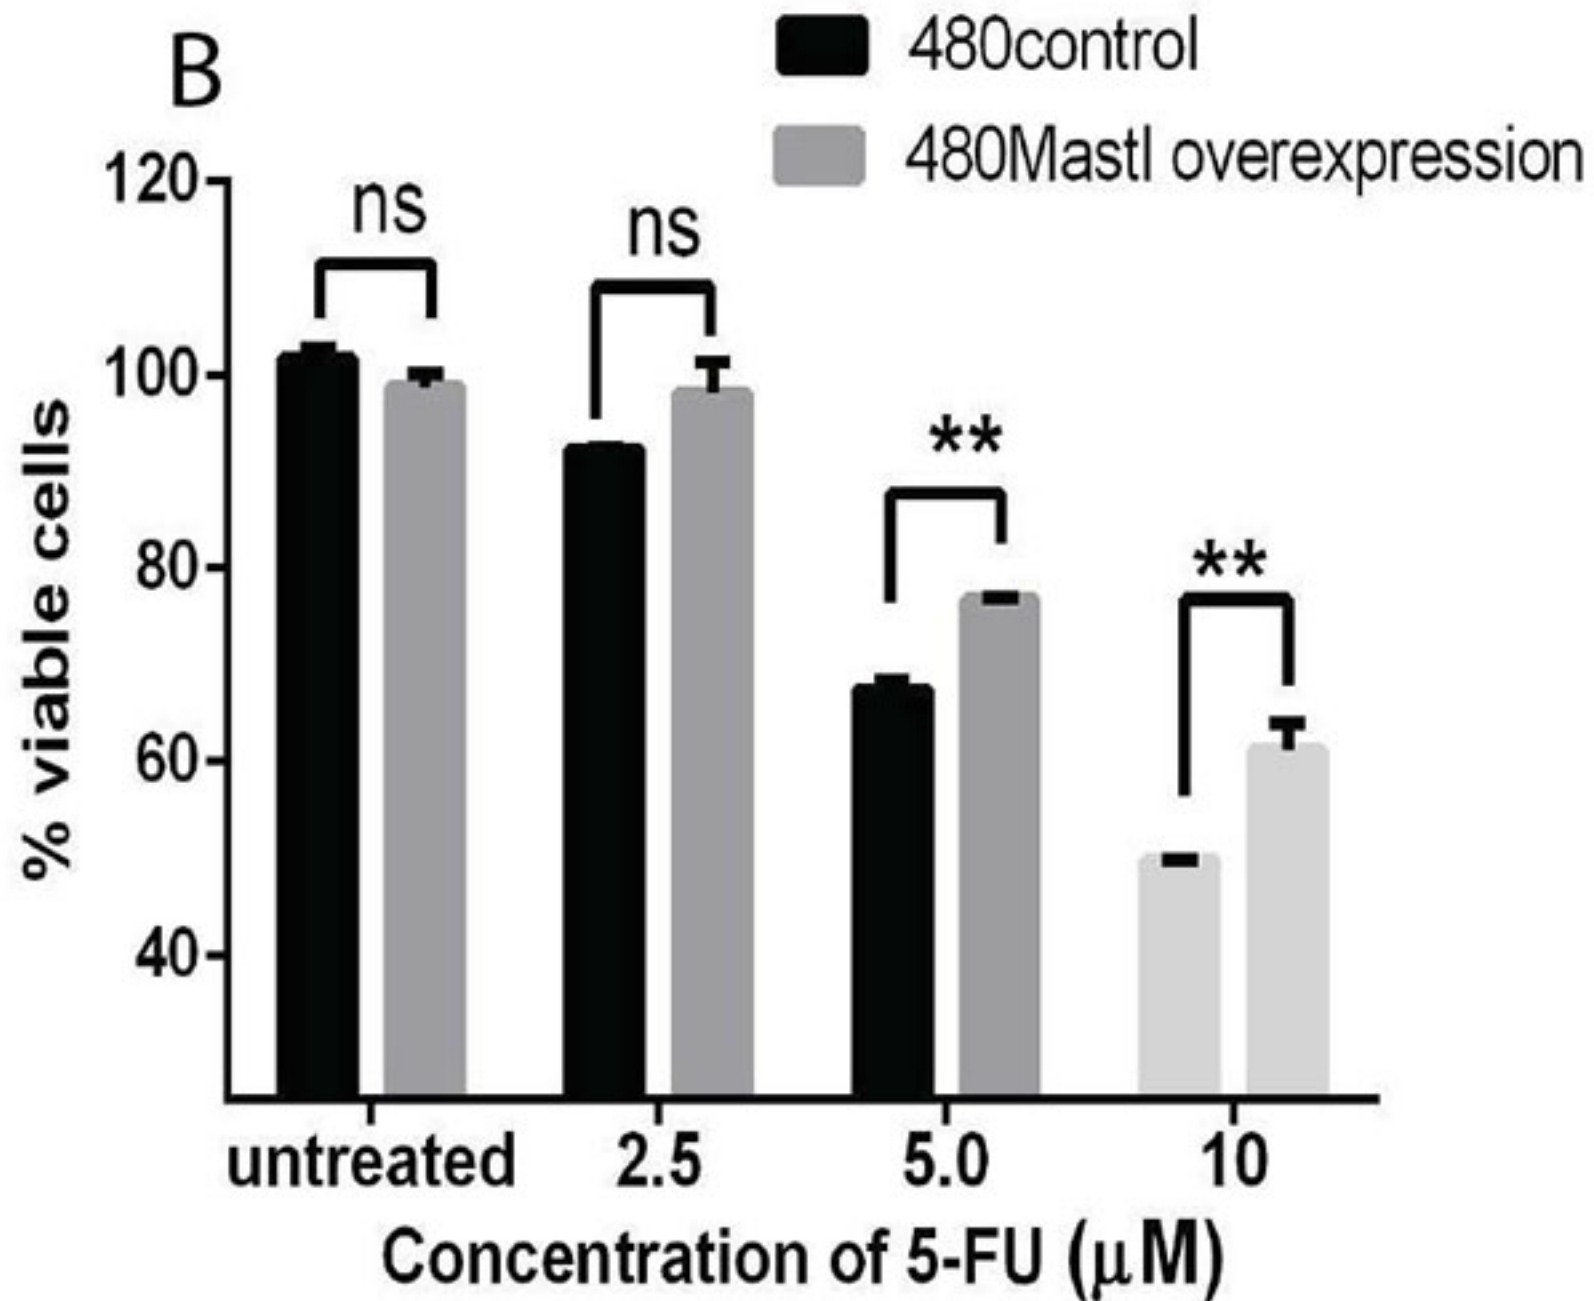

## MYC

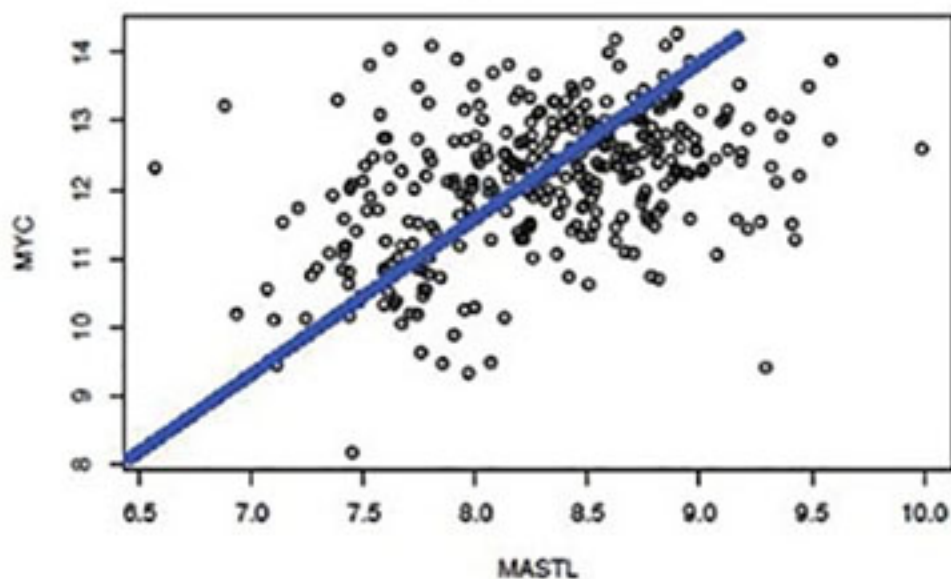

**$p < 0.0001$**

**Spearman's correlation: 0.4**

## BCL2L1

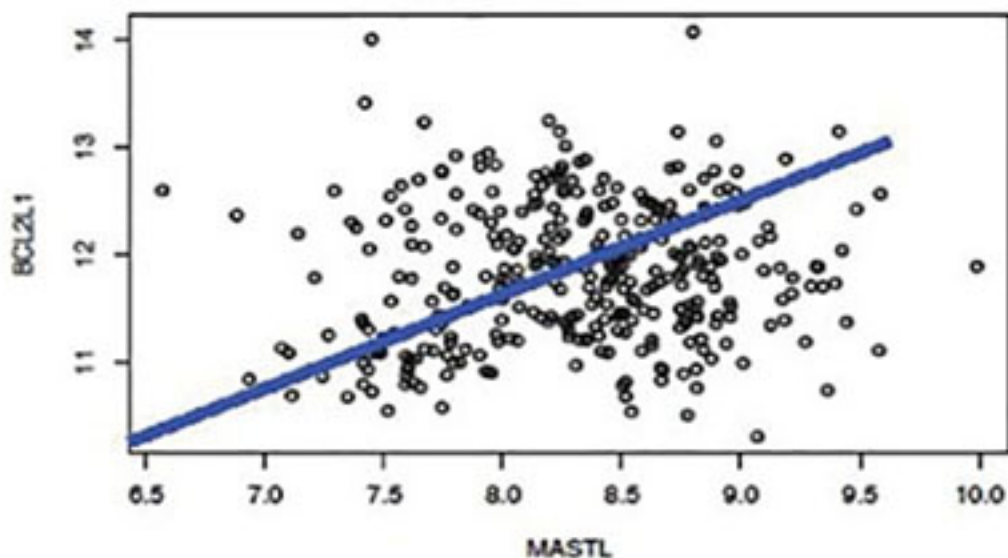

**$p = 0.05$**

**Spearman's correlation: 0.1**

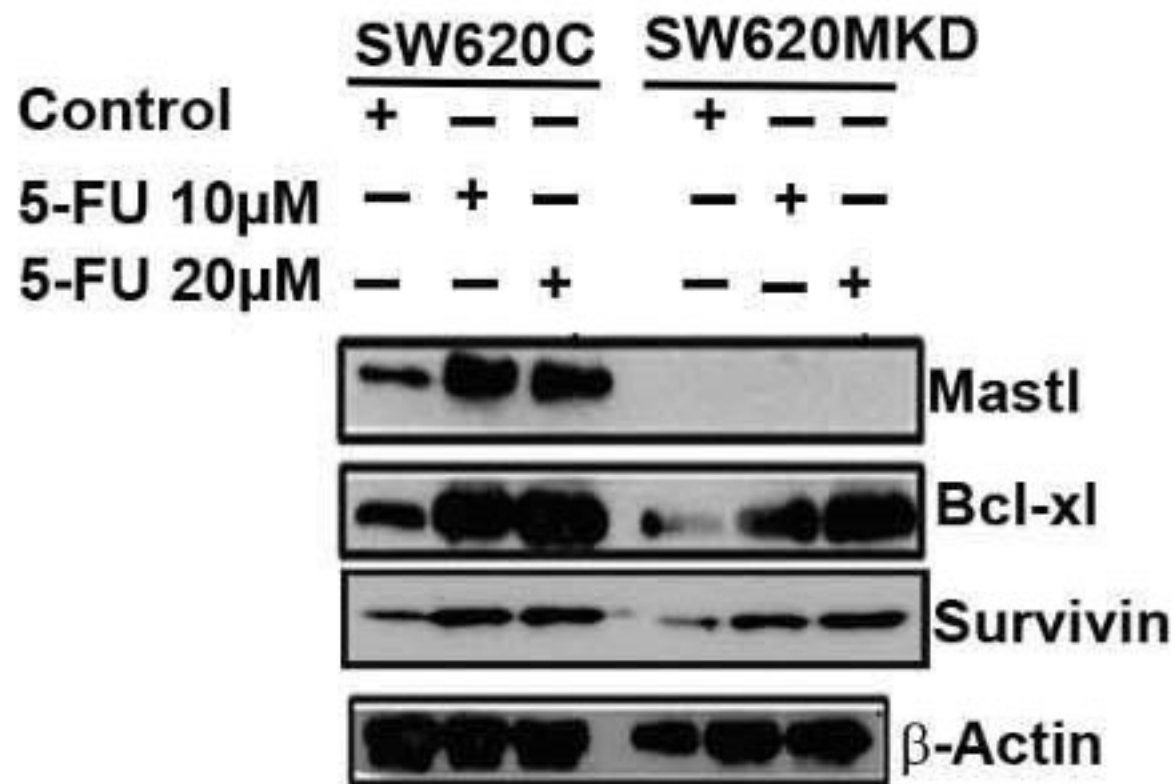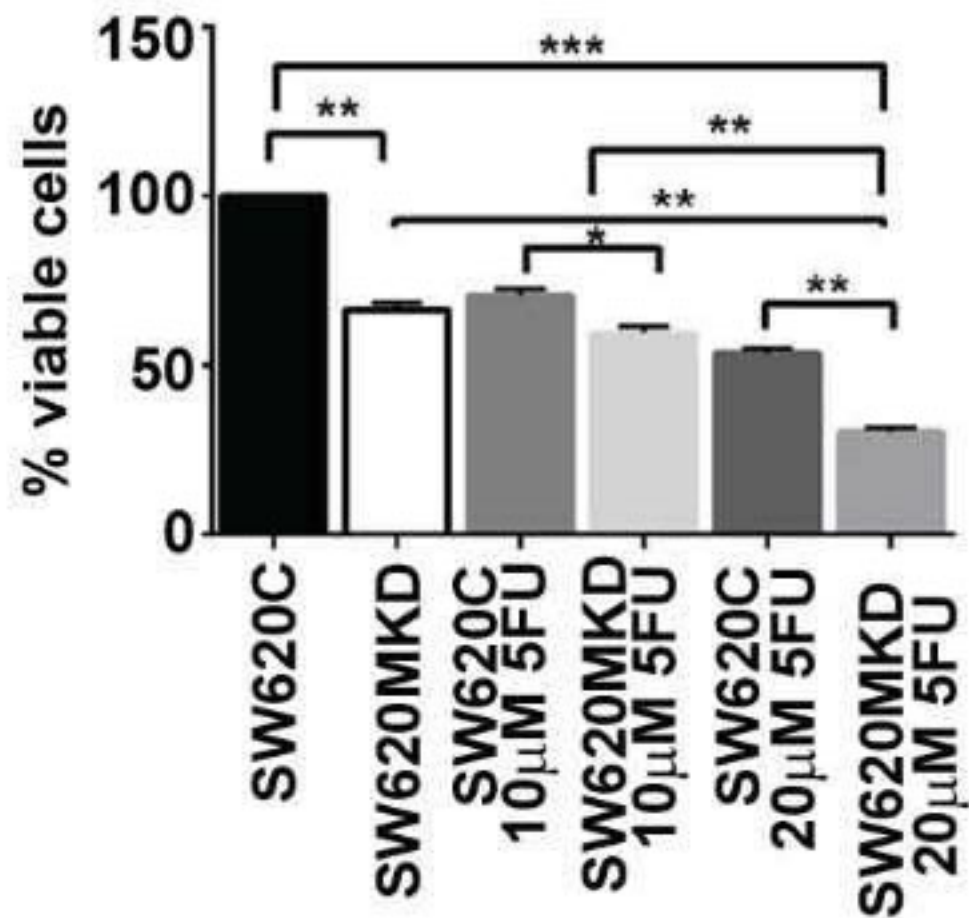

Supplement: MOESM1 [file 15994336]
